## RESEARCH ARTICLE

# A general equilibrium approach to pricing volatility risk

Jianlei Han<sup>1</sup>, Martina Linnenluecke<sup>1</sup>, Zhangxin Liu<sup>2</sup>, Zheyao Pan<sup>1</sup>, Tom Smith<sup>1\*</sup>

**1** Department of Applied Finance, Macquarie University, NSW, Australia, **2** UWA Business School, The University of Western Australia, Crawley, WA, Australia

\* [tom.smith@mq.edu.au](mailto:tom.smith@mq.edu.au)

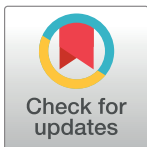

## Abstract

This paper provides a general equilibrium approach to pricing volatility. Existing models (e.g., ARCH/GARCH, stochastic volatility) take a statistical approach to estimating volatility, volatility indices (e.g., CBOE VIX) use a weighted combination of options, and utility based models assume a specific type of preferences. In contrast we treat volatility as an asset and price it using the general equilibrium state pricing framework. Our results show that the general equilibrium volatility method developed in this paper provides superior forecasting ability for realized volatility and serves as an effective fear gauge. We demonstrate the flexibility and generality of our approach by pricing downside risk and upside opportunity. Finally, we show that the superior forecasting ability of our approach generates significant economic value through volatility timing.

## OPEN ACCESS

**Citation:** Han J, Linnenluecke M, Liu Z, Pan Z, Smith T (2019) A general equilibrium approach to pricing volatility risk. PLoS ONE 14(4): e0215032. <https://doi.org/10.1371/journal.pone.0215032>

**Editor:** Petre Caraiani, Institute for Economic Forecasting, Romanian Academy, ROMANIA

**Received:** January 6, 2019

**Accepted:** March 25, 2019

**Published:** April 12, 2019

**Copyright:** © 2019 Han et al. This is an open access article distributed under the terms of the [Creative Commons Attribution License](https://creativecommons.org/licenses/by/4.0/), which permits unrestricted use, distribution, and reproduction in any medium, provided the original author and source are credited.

**Data Availability Statement:** All relevant data are within the manuscript and the supporting information file [S1 Data](#). Data from Wharton Research Data Services (WRDS): we obtain prices and implied volatilities of S&P 500 index options and S&P 500 index dividend yields from the Ivy DB US OptionMetrics, available through Wharton Research Data Services. Interest rates are taken from the Center for Research in Security Prices (CRSP) Zero Curve file, available through WRDS as well. For a researcher to have access to the databases in WRDS, the institution that the researcher belongs to must first subscribe the certain sub-databases (e.g., OptionMetrics and

## Introduction

Volatility modelling has proceeded as a field separate from asset pricing. Statistical models, such as ARCH [1, 2], GARCH [3], stochastic volatility [4], and option prices [5] are commonly used to estimate volatility, without reference to modern asset pricing theory. In this paper, we propose to *price* volatility using a general equilibrium asset-pricing framework. The advantage of such an approach is that volatility can be priced and measured in the most general setting available. The approach also allows us to extend measurement and pricing (such as downside risk pricing and upside opportunity pricing), which cannot be achieved with current approaches to volatility modelling.

This paper assumes a complete market setting where state prices are available for each time and state. State prices are derived from the general equilibrium state pricing framework [6]. Options complete the state space [7] and in this complete market all investors face the same state prices and these prices can be used to price any asset in the aggregated market. State prices are obtained for each time based on options written on the aggregate market (S&P 500 index as a proxy)[8]. We apply this state pricing approach to market volatility risk and are able to derive prices that are almost perfectly correlated with the CBOE Volatility Index (VIX) but are the result of a general equilibrium model. There are several advantages to treating volatility as any other asset and pricing it using the general equilibrium approach [6]. First, we treat

CRSP) provided by WRDS. The researcher can then register a WRDS Account and have access to the subscribed databases via the WRDS Web Site (<https://wrds-web.wharton.upenn.edu/wrds/>).

**Funding:** Two of the authors (MKL and TS) acknowledge funding from the Australian Research Council (ARC), Grant Number DP160103425.

**Competing interests:** The authors have declared that no competing interests exist.

volatility pricing the same as any other pricing exercise. Second, we do not have to assume a specific form of utility preferences (i.e., mean-variance or mean-variance-skewness or any other form) to implement this approach. Third, the equilibrium price of volatility provides not only a more general approach that is very flexible and can also be used for individual securities, but also serves as a better predictor of future volatility and as an investor fear gauge.

Empirically, we generate market state prices from the S&P 500 index options and use them to price the 49 Fama and French industry portfolio's volatility. Although our method can be applied to any traded asset, we focus on industries since understanding the volatility of a particular industry is crucial for both investors and policy makers [9, 10]. The ex-ante industry volatility measure constructed in this approach yields better forecasts of realized volatility than existing approaches and serves as a qualified investor fear gauge. We then demonstrate the flexibility and generality of our approach by pricing downside and upside opportunity, which complements the prior work [11–14]. We show that these new upside and downside volatility measures work well empirically. Finally, we analyze the economic value of volatility timing using the general equilibrium measures versus existing volatility measures. We show that the superior forecasting ability of our general equilibrium volatility measure has greater economic value for investors wishing to manage volatility.

Our paper is related to the recent literature on understanding volatility in a general equilibrium framework. As an extension of [15] and [16], Tauchen [17] proposes a consumption-based general equilibrium model that assumes stochastic consumption. The model generates a two-factor structure for stock market volatility along with time-varying risk premiums on consumptions and volatility risk, and the leverage effect. In the general equilibrium framework, Bansal *et al.* [18] demonstrate that besides the cash flow risk and discount rate risk, volatility risk is an important and separate risk source that cannot be ignored. In contrast to this strand of literature, we impose no assumptions on consumption dynamics and rely only on state prices extracted from the options market. The focus of these existing studies is to explain the stylized facts (e.g., leverage effect, equity risk premium) in the market, while we aim to provide market participants with an easy and flexible tool to measure and manage the volatilities of asset portfolios or individual securities.

Our paper is also related to the prior literature on constructing volatility indices based on options. As long established in the literature, ex-ante risk-neutral volatility can be built upon the fair value of future variance. Britten-Jones and Neuberger [19] use a replicating strategy to synthesize a variance swap using options contracts, assuming continuity in the underlying asset price. Jiang and Tian [20] build on a similar concept by incorporating a jump-diffusion stochastic volatility model. More recently, Martin [21] proposes a market level volatility index as the price of squared returns contract and proves it serves as the lower bound for the market risk premium. Martin and Wagner [22] extend the method of Martin [21] and develop a stock level volatility index and link it with the expected stock return. Sharing the same spirit of Martin [21] and the other existing literature, we also treat volatility (or more precisely, the squared return) as an asset. However, we adopt the general equilibrium approach and are able to construct volatility indices for assets without the need to use traded options. In contrast, Martin and Wagner [22]'s methodology can only be applied to individual stocks with the availability of options. Since options either do not exist or are illiquid for most stocks/industry portfolios, our approach is more general and has a wider application.

Our paper also adds to recent efforts to disentangle the effects of upside and downside uncertainty on asset prices [11, 14] by proposing a new approach for volatility decomposition. One common approach for decomposing volatility into upside and downside components is to use a threshold to compute risk-neutral expectations of semi-variances [12, 13, 23]. However, this approach still depends on the existence of traded options, while our approach does not.

The paper is organized as follows. Section 2 outlines volatility pricing using a general equilibrium model. Section 3 extends our approach to price downside risk and upside opportunity. Section 4 analyzes the economic value of our volatility measures in a volatility timing framework. Section 5 concludes.

## Methods and materials

### Pricing volatility in a general equilibrium model

This section outlines the general equilibrium approach for pricing market volatility and shows how it can be extended to pricing industry volatility. Industry volatility prices are compared with existing approaches to forecasting realized volatility and evaluated as a gauge of investor fear. We have obtained the appropriate permissions for use of third-party data and complied with the terms of service for the websites from which we collected data.

Under a state pricing approach, the value of any asset is the sum of the state prices multiplied by the payoff in each state. If, for example, we were to price the market portfolio  $M$  which pays off  $F_{ms}$  in each of  $S$  states one period (set as 30 days in this paper) from now, the price is given by:

$$P_m = \sum_{s=1}^S \phi_{ms} F_{ms} \tag{1}$$

Breeden and Litzenberger [8] argue that the market portfolio, as a proxy for aggregate consumption, is sufficient to represent the different states in the economy. We show in [S1 Appendix](#) how we obtain the state prices using market options, where the market is represented by S&P 500 index (SPX).

For an arbitrage asset  $i$ , whose payoff  $F_i$  depends on the level of the market, under the complete market setting, its price is given by:

$$P_i = \sum_{s=1}^S \phi_{ms} E[F_{is} | F_{ms}] \tag{2}$$

If we were to take a linear projection of  $F_i$  onto  $F_M$ , then we would obtain:

$$P_i = \sum_{s=1}^S \phi_{ms} [\alpha_i + \beta_i F_{ms}] \tag{3}$$

or

$$P_i = \alpha_{rfi} + \beta_i P_m \tag{4}$$

Since  $\sum_{s=1}^S \phi_{ms}$  is the price of a risk-free asset with payoff of 1,  $\alpha_{rfi}$  is the price of a riskless asset with payoff  $\alpha_i$ .

This is a relation that closely resembles the Sharpe-Lintner Capital Asset Pricing Model [24]; however, the derivation contains obvious differences. First, the market price of risk will vary over time as the state prices change. Second, the risk-free factor will be different for each asset  $i$  depending on the magnitude of  $\alpha_i$ . Moreover, a nonlinear projection of the conditional expectation leads to the mean-variance-skewness model of Kraus and Litzenberger [25]. [S2: Appendix](#) provides a more detailed discussion of the relation between state pricing theory, the CAPM and the co-skewness pricing.

We now consider pricing market volatility. Here, the payoff is the squared market return at each state. The price of market volatility under the general equilibrium state-pricing approach is given by:

$$SVX_M^2 = \sum_{s=1}^S \phi_{ms} R_{ms}^2 \tag{5}$$

where  $SVX_M$  is the state pricing volatility index for the market. It is the general equilibrium price of market volatility.

Compared to the calculation of the VIX, the  $SVX_M$  formula offers a more straightforward approach. For a more detailed discussion on how to construct  $SVX_M$  and how it performs against other volatility measures in predicting future market volatility, see [26]. The approach of using Arrow-Debreu securities to price squared returns has also been adopted in prior studies, see [27–29]. To price volatility on an arbitrary asset, for example industry  $I$ , the approach above yields:

$$SVX_I^2 = \sum_{s=1}^S \phi_{ms} E[R_{Is}^2 | R_{ms}^2] \tag{6}$$

An assumption of a linear relation between individual asset return and market return (as in Eq 3) would lead to a linear relation between individual asset return squared and market return squared conditional on the given market return,  $R_m$ . Naturally, we have:

$$SVX_I^2 = \sum_{s=1}^S \phi_{ms} [\alpha_I + \beta_I R_{ms}^2] \tag{7}$$

or

$$SVX_I^2 = \alpha_{rfI} + \beta_I SVX_M^2 \tag{8}$$

where  $\alpha_{rfI}$  is the price of a riskless asset with payoff  $\alpha_I$ ,  $SVX_M^2$  is as defined above in Eq 5.

The details of the construction of  $SVX_I$  are presented in S3: Appendix. We see that under the linear projection approach, the volatility price of any asset depends on the market price of volatility in a straightforward manner.

We compare two other volatility measures to our measure. The first is an ad-hoc industry volatility index using the widely available CBOE volatility index VIX. To achieve that, we simply replace  $SVX_M^2$  by  $VIX_M^2$ :

$$VIX_I^2 = \alpha_{rfI} + \beta_I VIX_M^2 \tag{9}$$

where  $VIX_M$  is the CBOE VIX.

The second measure is the historical volatility,  $HV_I$ , which is the realized volatility in the previous year.

### Data set

To estimate state prices in the complete market setting, we obtain prices and implied volatilities of S&P 500 index options and S&P 500 index dividend yields from the Ivy DB US Option Metrics, available through Wharton Research Data Services. The options data are available on a daily basis from January 4, 1996 to April 29, 2016. Interest rates are taken from the Center for Research in Security Prices (CRSP) Zero Curve file. We apply a cubic spline to the interest rate term-structure data to match the length of the risk-free rate with the corresponding option

maturity. The 49 industry portfolios are obtained from Kenneth R. French’s Data Library ([http://mba.tuck.dartmouth.edu/pages/faculty/ken.french/data\\_library.html](http://mba.tuck.dartmouth.edu/pages/faculty/ken.french/data_library.html)) and has been provided in [S1 Data](#). Given we need to estimate the betas in [Eq 7](#) using a fixed two-year rolling window, we examine daily industry returns since January 1994.

## Results and discussions

### Summary statistics of industry volatility indices

Summary statistics of  $SVX_I$  are reported in [Table 1](#). The mean of the annualized  $SVX_I$  varies across industries, ranging from 0.129 for the utility industry to 0.273 for the coal industry. Consistent with economic intuition, the “necessities” industries, such as Food, Soda, Beer, Smoke, and Utilities [[30](#)] are insensitive to business cycles, and are the least volatile, on average.

$SVX_I$  for the 49 industry portfolios is illustrated in [Fig 1](#). It is apparent that there is a strong positive correlation among the volatility indices. [Fig 1](#) also reveals that there is a significant time variation in volatility for all industries in the analysis, showing an upward spike in the 1998 Asian Financial Crisis and during the technology bubble of the early 2000’s. A peak occurs around the 2008 Global Financial Crisis.

### Forecasting future 30-day realized volatility

The primary goal of a volatility index is to serve as a measure of the next 30-day expected volatility [[31](#)]. In this section, we examine the information content of  $SVX_I$  in predicting subsequent 30-day realized return volatility from January 1996 to April 2016. We regress the future 30-day close-to-close realized volatility on different volatility measures in the following models:

$$RV_{I,t,t+30} = \alpha_I + \beta_I SVX_{I,t} + \varepsilon_{I,t,t+30} \tag{10}$$

where  $I$  stands for one of the 49 industry portfolios,  $RV_{I,t,t+30}$  denotes the annualized realized volatility over the next 30 days and it is defined as  $RV_{I,t,t+30} = 100 \left( \frac{365}{30} \sum_{i=1}^{22} R_i^2 \right)^{1/2}$ , where  $R_i^2$  is the square of the daily portfolio return. We also run this regression for  $VIX_I$  and  $HV_I$ , where  $HV_I$  is the annualized realized volatility in the previous year. These measures are highly correlated on average, so we cannot include both in the same regression to determine which index is more statistically significant. Instead, we use the Mincer and Zarnowitz [[32](#)] regression to compare the prediction performances of these three volatility measures.

To be an unbiased volatility predictor, we expect alphas to be not significantly different from 0 and betas to be not significantly different from 1. If  $SVX_I$  is a better predictor than the other measures, the forecasting regression using it as the predictor is expected to generate the highest model explanatory power, as expressed in adjusted R-squared.

We run the above regressions for each of 49 industry portfolios and report the arithmetic average of regression results in [Table 2](#). The covariance matrix is computed according to Newey and West [[33](#)] to correct for any potential serial correlations in the error terms.

The mean level of the  $\beta$  of  $SVX_I$  is 1.01, with an average standard error of 1.5%. As expected,  $\beta$  of  $SVX_I$  is significantly different from 0 at 1% level, and not significantly different from 1 at any levels. In comparison,  $\beta$  of  $VIX_I$  has a mean level of 0.918 with a standard error of 1.4%. It is significantly different from both 0 and 1 at 1% level.  $\beta$  of  $HV_I$  has the lowest mean level out of the three measures; namely, 0.677 with a standard error of 1.5%. On average,  $\alpha$  of  $SVX_I$  is 0.046, which is marginally significantly different from 0 at 5% level. The mean for  $\alpha$  of  $VIX_I$  is

**Table 1. Summary statistics of industry SVX<sub>t</sub>.**

| Industry | Obs   | Mean  | Std. Dev. | Min   | Max   |
|----------|-------|-------|-----------|-------|-------|
| Agric    | 5,099 | 0.150 | 0.103     | 0.039 | 0.950 |
| Food     | 5,099 | 0.132 | 0.051     | 0.052 | 0.482 |
| Soda     | 5,099 | 0.138 | 0.062     | 0.005 | 0.602 |
| Beer     | 5,099 | 0.136 | 0.067     | 0.044 | 0.481 |
| Smoke    | 5,099 | 0.143 | 0.066     | 0.049 | 0.645 |
| Toys     | 5,099 | 0.180 | 0.066     | 0.080 | 0.603 |
| Fun      | 5,099 | 0.216 | 0.098     | 0.088 | 0.893 |
| Books    | 5,099 | 0.165 | 0.079     | 0.060 | 0.772 |
| Hshld    | 5,099 | 0.145 | 0.060     | 0.059 | 0.534 |
| Clths    | 5,099 | 0.179 | 0.078     | 0.066 | 0.714 |
| Hlth     | 5,099 | 0.155 | 0.066     | 0.055 | 0.553 |
| MedEq    | 5,099 | 0.160 | 0.063     | 0.059 | 0.581 |
| Drugs    | 5,099 | 0.164 | 0.065     | 0.068 | 0.558 |
| Chems    | 5,099 | 0.188 | 0.083     | 0.091 | 0.818 |
| Rubbr    | 5,099 | 0.155 | 0.061     | 0.083 | 0.557 |
| Txtls    | 5,099 | 0.166 | 0.076     | 0.066 | 0.711 |
| BldMt    | 5,099 | 0.185 | 0.072     | 0.080 | 0.686 |
| Cnstr    | 5,099 | 0.224 | 0.095     | 0.097 | 1.080 |
| Steel    | 5,099 | 0.243 | 0.126     | 0.084 | 1.207 |
| FabPr    | 5,099 | 0.182 | 0.086     | 0.056 | 0.780 |
| Mach     | 5,099 | 0.210 | 0.088     | 0.104 | 0.863 |
| ElcEq    | 5,099 | 0.211 | 0.081     | 0.105 | 0.798 |
| Autos    | 5,099 | 0.212 | 0.089     | 0.101 | 0.839 |
| Aero     | 5,099 | 0.203 | 0.098     | 0.089 | 0.756 |
| Ships    | 5,099 | 0.168 | 0.073     | 0.073 | 0.784 |
| Guns     | 5,099 | 0.146 | 0.067     | 0.028 | 0.554 |
| Gold     | 5,043 | 0.184 | 0.102     | 0.005 | 0.925 |
| Mines    | 5,099 | 0.208 | 0.133     | 0.049 | 1.199 |
| Coal     | 4,735 | 0.273 | 0.154     | 0.007 | 1.363 |
| Oil      | 5,099 | 0.182 | 0.106     | 0.039 | 1.068 |
| Util     | 5,099 | 0.129 | 0.076     | 0.045 | 0.735 |
| Telcm    | 5,099 | 0.184 | 0.083     | 0.075 | 0.836 |
| PerSv    | 5,099 | 0.171 | 0.063     | 0.079 | 0.601 |
| BusSv    | 5,099 | 0.177 | 0.066     | 0.084 | 0.615 |
| Hardw    | 5,099 | 0.250 | 0.134     | 0.093 | 1.009 |
| Softw    | 5,099 | 0.224 | 0.105     | 0.090 | 0.770 |
| Chips    | 5,099 | 0.244 | 0.119     | 0.089 | 0.893 |
| LabEq    | 5,099 | 0.204 | 0.081     | 0.095 | 0.667 |
| Paper    | 5,099 | 0.162 | 0.061     | 0.085 | 0.631 |
| Boxes    | 5,099 | 0.171 | 0.069     | 0.072 | 0.678 |
| Trans    | 5,099 | 0.181 | 0.069     | 0.088 | 0.619 |
| Whlsl    | 5,099 | 0.156 | 0.059     | 0.078 | 0.605 |
| Rtail    | 5,099 | 0.182 | 0.074     | 0.073 | 0.626 |
| Meals    | 5,099 | 0.156 | 0.056     | 0.070 | 0.549 |
| Banks    | 5,099 | 0.229 | 0.114     | 0.083 | 1.494 |
| Insur    | 5,099 | 0.191 | 0.096     | 0.077 | 1.005 |
| RIEst    | 5,099 | 0.164 | 0.119     | 0.033 | 0.950 |

(Continued)

Table 1. (Continued)

| Industry | Obs   | Mean  | Std. Dev. | Min   | Max   |
|----------|-------|-------|-----------|-------|-------|
| Fin      | 5,099 | 0.263 | 0.132     | 0.094 | 1.331 |
| Other    | 5,099 | 0.179 | 0.088     | 0.060 | 0.669 |

This table presents summary statistics of Industry  $SVX_I$  of 49 industry portfolios. The data are from 4 January 1996 to 29 April 2016.

<https://doi.org/10.1371/journal.pone.0215032.t001>

0.04 and is not significantly different from 0 at 5% level. In comparison, the  $\alpha$  of  $HV_I$  has an average value of 0.072 and is significantly different from 0.  $SVX_I$  provides higher adjusted R-squared than the regressions using  $VIX_I$  and  $HV_I$ . On average, the model with  $SVX_I$  as the predictor has a 1.4% higher adjusted R-squared than  $VIX_I$  and 19% higher than  $HV_I$ . Therefore, we conclude that the state price volatility index  $SVX_I$  is a more efficient forecaster of future realized volatility than its counterparts. This industry-level result reinforces Liu and O’Neill [26]’s finding that state price volatility outperforms  $VIX$  and other predictors at the market level.

### Fear gauge

It is well-documented that there is a negative correlation between the rate of change in volatility (e.g., CBOE VIX) and daily market returns [34]. As expected, market volatility increases, investors demand a higher rate of return on stocks and prices fall, which ultimately leads to a drop in the current market return. Therefore, we study the contemporaneous relation between rates of change in various industry volatility measures and daily industry portfolio returns. In particular, we investigate whether these indices contain any fear information from the market state prices. Generally, a fall in an industry portfolio usually implies a rally in investor fear in

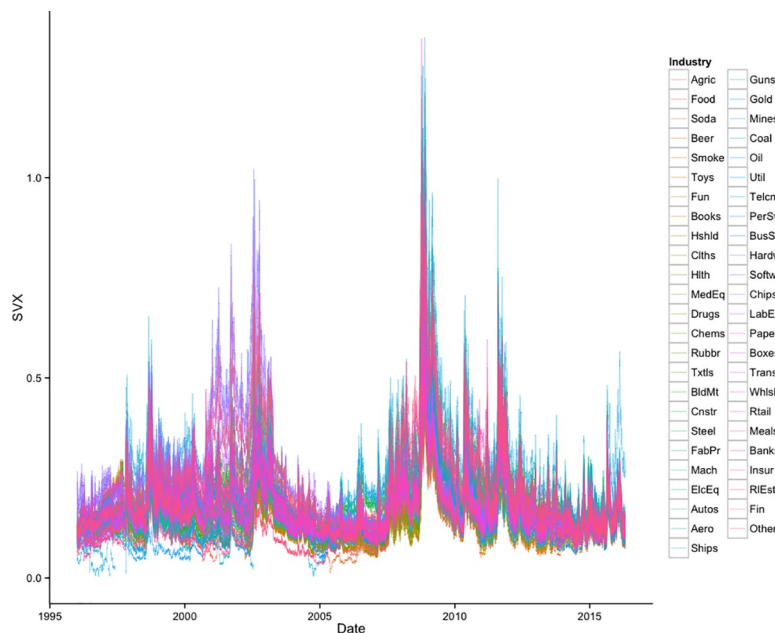

Fig 1.  $SVX_I$  for 49 industries: 1996–2016. This figure plots the Industry  $SVX_I$  of 49 industry portfolios. The data are from 4 January 1996 to 29 April 2016.

<https://doi.org/10.1371/journal.pone.0215032.g001>



Table 2. Forecasting realized volatility with  $SVX_I$ ,  $VIX_I$ , and  $HV_I$ .

| Dep Variable: $RV_I$ | Average of R2 | Average of Intercept | Average of $\beta$ for $SVX_I$ | Average of $\beta$ for $VIX_I$ | Average of $\beta$ for $HV_I$ |
|----------------------|---------------|----------------------|--------------------------------|--------------------------------|-------------------------------|
|                      | 47.2%         |                      |                                |                                |                               |
| Coef                 |               | 0.046**              | 1.010***                       |                                |                               |
| p-value              |               | 0.041                | 1.15E-133                      |                                |                               |
| Std Err              |               | 0.003                | 0.015                          |                                |                               |
|                      | 45.8%         |                      |                                |                                |                               |
| Coef                 |               | 0.044*               |                                | 0.918***                       |                               |
| p-value              |               | 0.057                |                                | 3.6E-100                       |                               |
| Std Err              |               | 0.003                |                                | 0.014                          |                               |
|                      | 28.2%         |                      |                                |                                |                               |
| Coef                 |               | 0.072***             |                                |                                | 0.677***                      |
| p-value              |               | 1.3E-25              |                                |                                | 9.2E-137                      |
| Std Err              |               | 0.004                |                                |                                | 0.015                         |

This table presents the average OLS estimates of regressions in Eq (10). The regressions take the following general form

$$Y = \alpha + \beta X + \epsilon$$

All coefficients, p-values, and standard errors are an average of the corresponding measures from 49 regressions on all industry portfolios. Dependent variable  $RV_I$  is annualized realized volatility in future 30 days of one of 49 industry portfolios, where  $RV = 100 \times (365/30 \times \sum_{i=1}^{22} R_i^2)^{1/2}$  and  $R_i$  is the daily portfolio return. The data are from 4 January 1996 to 29 April 2016. To correct for autocorrelation and heteroskedasticity, we use the Newey-West estimator for covariance matrix with automatically selected lags as in Newey and West [33].

\*\*\*, \*\*, and \* denote significance at the 0.01, 0.05, and 0.10 level, respectively.

<https://doi.org/10.1371/journal.pone.0215032.t002>

the segment. Therefore, we expect to see negative betas in all volatility measures. A fear gauge, such as CBOE VIX [35], should respond more to negative changes in portfolio returns than positive changes. We are interested in testing whether industry state price volatility measures can capture this asymmetric fear gauge effect. We regress the daily changes of various measures against industry portfolio returns in the following forms:

$$\Delta SVX_{I,t} = \alpha_I + \beta_{1,I} R_{I,t} + \beta_{2,I} R_{I,t}^- + \epsilon_{I,t} \tag{11}$$

where  $I$  stands for each of the 49 industry portfolios,  $\Delta$  measures the daily changes, and  $R_{I,t}$  is the daily industry portfolio return,  $R_{I,t}^-$  is defined as  $\min(R_{I,t}, 0)$ .

We run the above regressions for each of 49 industry portfolios and report the arithmetic average of regression results in Table 3. The covariance matrix is computed according to Newey and West [33] to correct for any potential serial correlations in the error terms. On average,  $\beta_1$  is significantly less than 0 at the 1% level, implying that there is an inverse relation between contemporaneous changes in volatility indices and changes in portfolio returns.  $\beta_2$  is also significantly less than 0 at the 1% level. These results show that the response to different swings in portfolio returns is strongly asymmetric, and are consistent with the findings of [35] and [26]. Besides statistical significance, the coefficients are also economically meaningful: on average, an increase in the industry return by 100 basis would result in 51.7 basis decrease in  $SVX_I$  and an decrease in the industry return by 100 basis would lead to 73.8 basis increase in  $SVX_I$ .

### Downside risk and upside opportunity in a general equilibrium model

Recent literature highlights the importance of distinguishing downside and upside volatility risk [11, 14, 36]. Here, we use the general pricing approach to price downside risk and upside risk.



**Table 3. Regression results of rate change of SVX<sub>I</sub> against returns of industry portfolios.**

| Dep Variable: ΔSVX <sub>I</sub> | Average of R2 | Average of Intercept | Average of β <sub>1</sub> for R <sub>I,t</sub> | Average of β <sub>2</sub> for R <sub>I,t</sub> <sup>-</sup> |
|---------------------------------|---------------|----------------------|------------------------------------------------|-------------------------------------------------------------|
|                                 | 36.7%         |                      |                                                |                                                             |
| Coef                            |               | -0.001*              | -0.517***                                      | -0.221***                                                   |
| p-value                         |               | 0.051                | 0.000                                          | 0.001                                                       |
| Std Err                         |               | 0.000                | 0.019                                          | 0.032                                                       |

This table presents the average OLS estimates of regressions in Eq (11). The regressions take the following general form

$$\Delta SVX_{I,t} = \alpha + \beta_1 R_{I,t} + \beta_2 R_{I,t}^- + \epsilon$$

All coefficients, p-values, and standard errors are an average of the corresponding measures from 49 regressions on all industry portfolios. Independent variables include RI, daily return of the corresponding industry portfolio; and RI<sup>-</sup>, daily return of the corresponding industry portfolio conditional on whether the return is below 0, i.e., RI<sup>-</sup> = min(RI, 0). The dependent variable is the daily return of SVXI, where ΔSVX<sub>I,t</sub> = ln(SVX<sub>I,t</sub>/SVX<sub>I,t-1</sub>). The return data are from 4 January 1996 to 29 April 2016. To correct for autocorrelation and heteroskedasticity, we use the Newey-West estimator for covariance matrix with automatically selected lags as in Newey and West [33].

\*\*\*, \*\*, and \* denote significance at the 0.01, 0.05, and 0.10 level, respectively.

<https://doi.org/10.1371/journal.pone.0215032.t003>

Downside market risk is given by:

$$BEX_M = \sqrt{\sum_{s=1}^S \phi_{ms} R_{ms}^2 I_{R_{ms}<0}} \tag{12}$$

where  $I_{R_{ms}<0}$  is an indicator variable equal to 1 if  $R_{ms}$  is less than zero.

Similarly, upside market risk is given by:

$$BUX_M = \sqrt{\sum_{s=1}^S \phi_{ms} R_{ms}^2 I_{R_{ms}>0}} \tag{13}$$

where  $I_{R_{ms}>0}$  is an indicator variable equal to 1 if  $R_{ms}$  is greater than zero.

Industry measures of BEX and BUX are obtained in an analogous manner to industry volatility SVX<sub>I</sub> (Eq 7) and can be represented as:

$$BEX_I^2 = \alpha_{Down,I} + \beta_{Down,I} BEX_M^2 \tag{14}$$

$$BUX_I^2 = \alpha_{Up,I} + \beta_{Up,I} BUX_M^2 \tag{15}$$

To estimate the alphas and betas in Eq 14 and Eq 15, we use a linear least squares regression of squared daily industry returns on squared S&P 500 market returns. Specifically, we are interested in the alphas and betas in the following regressions:

$$R_I^2 = \alpha_{Down,I} + \beta_{Down,I} R_{M|Down}^2 + \epsilon_I \tag{16}$$

$$R_I^2 = \alpha_{Up,I} + \beta_{Up,I} R_{M|Up}^2 + \epsilon_I \tag{17}$$

where  $R_I^2$  is the daily squared industry return, and  $R_{M|Down}^2$  ( $R_{M|Up}^2$ ) is the market return squared conditional on whether the market has gone down (up) from the previous day, regardless of movement in the industry portfolio. We also considered different definitions of conditional downturn return squared for the industry portfolio. We selected the current definition because it is more meaningful for examining how the industry portfolio responds and contributes to a downturn in the whole market. The return is computed using the closing value at the end of

day. We estimate each beta using a two-year fixed rolling window. That is, on the 505<sup>th</sup> day, we use the past two years (504 trading days) of return squared to estimate the alphas and betas in the above regressions.

### Industry state-price volatility that incorporates downside market volatility

Prior studies have shown that returns become more correlated in a bear market (e.g., [37, 38]). As a result, we extend the basic formula for  $SVX_I$  by using an alternative linear projection that incorporates market downside movement:

$$(SVX_I^D)^2 = \sum_{s=1}^S \phi_{ms} [\alpha_I + \beta_I R_{ms}^2 + \gamma_I R_{ms}^2 I_{R_{ms} \leq 0}] \tag{18}$$

Which can be solved to yield:

$$(SVX_I^D)^2 = \alpha_{rfl} + \beta_I SVX_M^2 + \gamma_I BEX_M^2 \tag{19}$$

where  $\alpha_{rfl}$  is the price of a riskless asset with payoff  $\alpha_I$ ,  $SVX_M^2$  is as defined above in Eq 4, and  $I_{R_{ms} \leq 0}$  is an indicator variable equal to 1 if  $R_{ms}$  is less than zero. In this definition, the volatility price of any asset depends on its sensitivity to the price of market volatility and (in addition) to the price of market downside volatility.

To estimate the alphas, betas, and gammas in Eq 19, we use a linear least square regression of squared daily industry returns on squared daily S&P 500 market returns.

$$R_I^2 = \alpha_{Down,I} + \beta_{Down,I} R_M^2 + \gamma_{Down,I} R_{M|Down}^2 + \varepsilon_I \tag{20}$$

where  $R_I^2$  is the daily squared industry return, and  $R_{M|Down}^2$  is the market return squared conditional on whether the market has gone down from the previous day, regardless of movement in the industry portfolio.

### Forecasting future 30-day realized volatility with $SVX_I^D$

To extend the analysis described in Section 2.3, we examine the information content of  $SVX_I^D$  in predicting the future 30-day realized volatility in each industry portfolio. We regress the future 30-day close-to-close realized volatility on different volatility measures in the following models:

$$RV_{I,t,t+30} = \alpha_I + \beta_I SVX_{I,t}^D + \varepsilon_{I,t,t+30} \tag{21}$$

Results are reported in Table 4 Panel A. The mean level of  $\beta$  of  $SVX_I^D$  is 1.003, with an average standard error of 1.5%.  $\beta$  of  $SVX_I^D$  is significantly different from 0 at 1% level, and not significantly different from 1 at any levels. Comparing to results in Table 2, we can see that  $SVX_I^D$  outperforms other volatility candidates in terms of adjusted R-squared.

### Forecasting future 30-day realized downside volatility

A typical volatility measure does not describe the proportion of upside gain versus downside threat. In this paper, we solve this problem by introducing a downside (upside) volatility index  $BEX_I(BUX_I)$  for each industry portfolio as an *ex-ante* predictor of future downside (upside) volatility. It is important to note that, unlike the comparison with  $SVX_I$  and  $VIX_I$  in the previous section, we do not have a VIX benchmark per se because is not mathematically feasible to derive a downside VIX using market state prices. We regress the future 30-day close-to-close

**Table 4. Forecasting realized volatility and downside realized volatility with  $SVX_I^D$  and  $BEX_I$ .**

|                | Dep Variable | Average of R2 | Average of Intercept | Average of $\beta$ for $SVX_I^D$ | Average of $\beta$ for $BEX_I$ |
|----------------|--------------|---------------|----------------------|----------------------------------|--------------------------------|
| <b>Panel A</b> | $RV_I$       | 47.3%         |                      |                                  |                                |
|                | Coef         |               | 0.047**              | 1.003***                         |                                |
|                | p-value      |               | 0.046                | 1.27E-133                        |                                |
|                | Std Err      |               | 0.003                | 0.015                            |                                |
| <b>Panel B</b> | $RV_I^D$     | 34.7%         |                      |                                  |                                |
|                | Coef         |               | 0.029*               |                                  | 0.917***                       |
|                | p-value      |               | 0.058                |                                  | 8.3E-166                       |
|                | Std Err      |               | 0.003                |                                  | 0.018                          |

This table presents the average OLS estimates of regressions in Sections III C and D. The regressions take the following general form

$$Y = \alpha + \beta X + \epsilon$$

All coefficients, p-values, and standard errors are an average of the corresponding measures from 49 regressions on all industry portfolios. Dependent variables include; (1) RV is annualized realized volatility in future 30 days of one of 49 industry portfolios, where  $RV = 100 \times (365/30 \times \sum_{i=1}^{22} R_i^2)^{1/2}$  and  $R_i$  is the daily portfolio return; and (2) RVDI is the realized downside volatility in future 30 days of one of 49 industry portfolios, where  $RVD = 100 \times (365/30 \times \sum_{i=1}^{22} R_i^2 I_{R_i \leq 0})^{1/2}$ . The data are from 4 January 1996 to 29 April 2016. To correct for autocorrelation and heteroskedasticity, we use the Newey-West estimator for covariance matrix with automatically selected lags as in Newey and West [33].

\*\*\*, \*\*, and \* denote significance at the 0.01, 0.05, and 0.10 level, respectively.

<https://doi.org/10.1371/journal.pone.0215032.t004>

realized downside volatility in the following way:

$$RVD_{I,t,t+30} = \alpha_I + \beta_I BEX_{I,t}^2 + \epsilon_{I,t,t+30} \tag{22}$$

where  $I$  stands for each of the 49 industry portfolios,  $RVD_{I,t,t+30}$  denotes the realized downside volatility over the next 30 days and it is defined as  $RVD_{I,t,t+30} = 100 \left( \frac{365}{30} \sum_{i=1}^{22} R_{i=1}^{22} I_{R_i \leq 0} \right)^{1/2}$ .

We expect alphas to be not significantly different from 0 and betas to be not significantly different from 1 if  $BEX_I$  is an unbiased forecaster, and betas to be significantly different from 0. We run the above regression for each of 49 industry portfolios and report the arithmetic average of regression results in Panel B in Table 4. The covariance matrix is computed according to Newey and West [33] to correct for any potential serial correlations in the error terms. The mean level of  $\beta$  of  $BEX_I$  is 0.917, with an average standard error of 1.8%.  $\beta$  of  $BEX_I$  is significantly different from 0 and 1 at 1% level. On average,  $\alpha$  of  $BEX_I$  is 0.029 and is not significantly different from 0 at 5% level. The average adjusted R-squared of Eq 22 is 34.7%. We show that  $BEX_I$  is an efficient forecaster of future realized downside volatility.

### Fear gauge property of $SVX_I^D$

We further study the contemporaneous relation between rates of change in  $SVX_I^D$  and daily industry portfolio returns. We are interested in testing whether the modified industry volatility measure can better capture the fear gauge. We regress the daily changes of  $SVX_I^D$  against the industry portfolio returns in the following forms:

$$\Delta SVX_{I,t}^D = \alpha_I + \beta_{1,I} R_{I,t} + \beta_{2,I} R_{I,t}^- + \epsilon_{I,t} \tag{23}$$

where  $I$  stands for each of the 49 industry portfolios,  $\Delta$  measures the daily changes, and  $R_{I,t}$  is the daily industry portfolio return,  $R_{I,t}^-$  is defined as  $\min(R_{I,t}, 0)$ . We perform a similar analysis for  $\Delta BEX_{I,t}^D$  to see whether the downside volatility measure can serve as a qualified fear gauge or not.

Table 5. Regression results of rate change of  $SVX^D_I$  and  $\Delta BEX_I$  against returns of industry portfolios.

|                | Dep Variable     | Average of R2 | Average of Intercept | Average of $\beta_1$ for $R_{i,t}$ | Average of $\beta_2$ for $R_{i,t}$ |
|----------------|------------------|---------------|----------------------|------------------------------------|------------------------------------|
| <b>Panel A</b> | $\Delta SVX^D_I$ | 37.9%         |                      |                                    |                                    |
|                | Coef             |               | -0.001*              | -0.514***                          | -0.222***                          |
|                | p-value          |               | 0.051                | 0.000                              | 0.001                              |
|                | Std Err          |               | 0.000                | 0.019                              | 0.031                              |
| <b>Panel B</b> | $\Delta BEX_I$   | 37.6%         |                      |                                    |                                    |
|                | Coef             |               | -0.001*              | -0.397***                          | -0.171***                          |
|                | p-value          |               | 0.055                | 0.003                              | 0.002                              |
|                | Std Err          |               | 0.000                | 0.015                              | 0.025                              |

This table presents the average OLS estimates of regressions in Eq (23). The regressions take the following general form

$$\Delta SVX^D_{i,t} = \alpha + \beta_1 R_{i,t} + \beta_2 R_{i,t}^- + \varepsilon$$

All coefficients, p-values, and standard errors are an average of the corresponding measures from 49 regressions on all industry portfolios. Independent variables include  $R_i$ , daily return of the corresponding industry portfolio; and  $R_i^-$ , daily return of the corresponding industry portfolio conditional on whether the return is below 0, i.e.  $R_i^- = \min(R_i, 0)$ . The dependent variable is the daily return of  $SVXDI$ , where  $\Delta SVX^D_{i,t} = \ln(SVX^D_{i,t}/SVX^D_{i,t-1})$ . The return data are from 4 January 1996 to 29 April 2016. To correct for autocorrelation and heteroskedasticity, we use the Newey-West estimator for covariance matrix with automatically selected lags as in Newey and West [33].

\*\*\*, \*\*, and \* denote significance at the 0.01, 0.05, and 0.10 level, respectively.

<https://doi.org/10.1371/journal.pone.0215032.t005>

We run the above regressions for each of 49 industry portfolios and report the arithmetic average of regression results in Table 5. The covariance matrix is computed according to Newey and West [33] to correct for any potential serial correlations in the error terms. On average, for both  $\Delta SVX^D_{i,t}$  and  $\Delta BEX^D_{i,t}$ , all  $\beta_1$  are significantly less than 0 at 1% level, implying there is an inverse relation between the contemporaneous changes of volatility indices and those of portfolio returns. For both  $\Delta SVX^D_{i,t}$  and  $\Delta BEX^D_{i,t}$ ,  $\beta_2$  are also significantly less than 0 at 1% level. These results show that the response to different swings in portfolio returns is strongly asymmetric. This is consistent with findings reported above. By comparing the adjusted R-squared between Table 5 and Table 2, we can see that incorporating the downside risk into the volatility index can enhance monitoring effectiveness (37.9% and 37.6% for  $\Delta SVX^D_{i,t}$  and  $\Delta BEX^D_{i,t}$  in Table 5, and 36.7% for  $\Delta SVX_{i,t}$  in Table 2). The results confirm that measures incorporating downside risk are better measures of fear gauge.

### Volatility forecasting: Out of sample evidence

Besides the in-sample forecasting evidence, here we further compare the volatility predictability by examining the out-of-sample tests for four volatility predictors:  $HV_t$ ,  $VIX_t$ ,  $SVX_t$ , and  $SVX^D_t$ . Specifically, we use a rolling fixed window approach. Every day, each forecasting model is estimated with a fixed rolling window to obtain the one-month-ahead volatility forecast. To ensure robustness, we use a one-year window, a two-year window and a three-year window. The out-of-sample forecasting accuracy is judged by three criteria: root-mean-square error (RMSE), mean-absolute error (MAE) and mean-absolute-percentage error (MAPE).

Table 6 reports the estimation results for the average values of RMSE, MAE and MAPE across 49 industries in three different rolling windows. First,  $HV_t$  performs the worst among four volatility measures, regardless of criterion or rolling window. For instance, in the one-year rolling window case, the average RMSE values for  $VIX_t$ ,  $SVX_t$ , and  $SVX^D_t$  are all around 0.083, while it is 0.100 for  $HV_t$ . Second, in almost all the scenarios,  $SVX^D_t$  is the best predictor,

**Table 6. Out-of-sample volatility forecasting results.**

| Panel A: 1-year rolling window |        |        |         |
|--------------------------------|--------|--------|---------|
|                                | RMSE   | MAE    | MAPE    |
| HV <sub>I</sub>                | 0.1005 | 0.0665 | 27.8261 |
| VIX <sub>I</sub>               | 0.0838 | 0.0555 | 23.2998 |
| SVX <sub>I</sub>               | 0.0832 | 0.0554 | 23.3153 |
| SVX <sup>D</sup> <sub>I</sub>  | 0.0832 | 0.0554 | 23.3428 |
| Panel B: 2-year rolling window |        |        |         |
|                                | RMSE   | MAE    | MAPE    |
| HV <sub>I</sub>                | 0.1086 | 0.0753 | 32.7627 |
| VIX <sub>I</sub>               | 0.0879 | 0.0593 | 25.196  |
| SVX <sub>I</sub>               | 0.0868 | 0.0587 | 24.9739 |
| SVX <sup>D</sup> <sub>I</sub>  | 0.0867 | 0.0586 | 24.961  |
| Panel C: 3-year rolling window |        |        |         |
|                                | RMSE   | MAE    | MAPE    |
| HV <sub>I</sub>                | 0.1102 | 0.0783 | 35.130  |
| VIX <sub>I</sub>               | 0.0906 | 0.0621 | 26.763  |
| SVX <sub>I</sub>               | 0.0894 | 0.0613 | 26.417  |
| SVX <sup>D</sup> <sub>I</sub>  | 0.0891 | 0.0611 | 26.370  |

This table reports the out-of-sample forecasting results from January 1996 to April 2016 with a fixed rolling window approach. We report average values of RMSE, MAE and MAPE for 49 industries in the 1-year window, 2-year window, and 3-year window.

<https://doi.org/10.1371/journal.pone.0215032.t006>

with SVX<sub>I</sub> and VIX<sub>I</sub> being the second and third best predictors. Overall, the out-of-sample forecasting results reiterate the earlier in-sample test findings.

### Economic value of volatility timing

This section investigates the economic value of using various predictors to forecast monthly industry volatility. We start from assuming an investor has a negative exponential utility function:

$$U = -e^{-\gamma\tilde{w}}, \tag{24}$$

where  $\tilde{w}$  represents the wealth of the investor, and  $\gamma$  refers to the coefficient of the investor’s risk aversion. The expected utility takes the form of:

$$E(U) = \int_{-\infty}^{+\infty} -f(\tilde{w})e^{-\gamma\tilde{w}} d\tilde{w}, \tag{25}$$

where  $f(\tilde{w})$  is the density function of  $\tilde{w}$ , and expression of  $f(\tilde{w})$  depends on the distribution of  $\tilde{w}$ .

In this study, for the sake of comparability with the literature on volatility timing [39–41], we choose normality for the distribution of  $\tilde{w}$ . Following [42] and [43], suppose that  $\tilde{w}$  is distributed normally with mean,  $\mu$ , and standard deviation,  $\sigma$ , the density of  $\tilde{w}$ :

$$f(\tilde{w}) = \frac{e^{-\frac{(\tilde{w}-\mu)^2}{2\sigma^2}}}{\sigma\sqrt{2\pi}}, \tag{26}$$

Substituting Eq 26 into Eq 25, and making a few rearrangements, we have:

$$E(U) = -e^{-\gamma(\mu-0.5\gamma\sigma^2)}, \tag{27}$$

Henceforth, the objective of the investor is to maximize the expression of  $\mu - 0.5\gamma\sigma^2$ , which leads to the mean-variance utility function.

Since in our setting, the investor's wealth depends on the return of the portfolio invested, that is  $\tilde{w} = w_0(1 + R_p)$ , where  $w_0$  is the initial wealth, the maximum problem is equivalent to:

$$U[E_t(R_{p,t+1}), \sigma_{p,t+1}^2] = E_t(R_{p,t+1}) - 0.5\gamma\sigma_{p,t+1}^2, \tag{28}$$

where  $E_t(R_{p,t+1})$  and  $\sigma_{p,t+1}^2$  respectively are the conditional mean and variance of the portfolio returns. We set  $\gamma$  to a realistic estimate of 3, as suggested by [44] and [45]. We also use values of  $\gamma$  of 4 and 5 for robustness and sensitivity analysis.

In the volatility timing strategy, the investor allocates wealth between an industry portfolio and a risk-free asset using a volatility predictor to maximize utility gains. The portfolio return is  $E_t(R_{p,t+1}) = r_{f,t+1} + k_t(E_t(R_{I,t+1}) - r_{f,t+1})$ , where  $k_t$  is the portfolio weight of industry portfolio  $I$ ,  $E_t(R_{I,t+1})$  is the conditional expected return of the industry portfolio, and  $r_{f,t+1}$  denotes the risk-free rate, which is known *ex-ante*. The portfolio variance is  $\sigma_{p,t+1}^2 = k_t^2\sigma_{I,t+1}^2$ , where  $\sigma_{I,t+1}^2$  denotes the conditional variance of industry portfolio  $I$ . The optimal weight for industry  $I$  is given by:

$$k_t = \frac{E_t(R_{I,t+1}) - r_{f,t+1}}{\gamma\sigma_{I,t+1}^2}, \tag{29}$$

The current study focuses on monthly realized volatility forecasting, so we assume the portfolio is rebalanced monthly. We set the month  $t$  expected return as the historical mean using return data up to period  $t$ . The expected variance of portfolio  $I$ ,  $\sigma_{I,t+1}^2$ , is based on the two-year rolling out-of-sample forecast using Eq 10, with one of four different volatility measures ( $HV_I$ ,  $VIX_I$ ,  $SVX_I$ , and  $SVX_I^D$ ) as the predictor. The accuracy of volatility forecasting determines the performance of this volatility timing strategy. Our benchmark strategy is the buy-and-hold strategy of the respective industry portfolios,  $I$ .

To be consistent with our utility specification in Eq 24, we compare the performance of different strategies based on the certainty equivalent return (CER) gain of a volatility timing strategy relative to that of a naïve buy-and-hold strategy:

$$CER = (R_p - 0.5\gamma\sigma_p^2) - (R_{naive} - 0.5\gamma\sigma_{naive}^2). \tag{30}$$

Intuitively, the CER gains of Eq 30 are the incremental management fees that the investor is willing to pay to invest in the volatility timing strategies based on the volatility forecasts over the buy-and-hold strategy.

Table 7 presents the average performance of 49 industries from January 1998 to April 2016. In Panel A, we assume there is no transaction cost. We first examine the basic case of  $\gamma$  equal to 3. The results on CER gains reveal that all the volatility timing strategies outperform the buy-and-hold strategy.  $SVX_I^D$  again performs best: the investor is prepared to pay a hefty incremental annual management fee of 311 basis points bps to have access to predictive regression based on  $SVX_I^D$ , instead of the buy-and-hold strategy. In contrast, the investor is only willing to pay 249 bps for the strategy using  $HV_I$ . Moreover, the management fees that the investor is willing to pay to be involved with the volatility timing strategy using  $SVX_I^D$  increase from 331 bps ( $\gamma = 3$ ) to 590 bps ( $\gamma = 4$ ) and 866 bps ( $\gamma = 5$ ). This result suggests that volatility timing is especially important for risk-averse investors.

The volatility timing strategy requires monthly rebalancing, so its performance might be sensitive to transaction costs. With this in mind, we analyze the impact of transaction costs on our results. Following [46] and [47], we define the transaction cost adjusted portfolio return as

**Table 7. Out-of-sample portfolio performance: Monthly rebalancing.**

| Panel A: Without Transaction Cost      |              |              |              |
|----------------------------------------|--------------|--------------|--------------|
|                                        | $\gamma = 3$ | $\gamma = 4$ | $\gamma = 5$ |
| Predictor                              | CER (bps)    | CER (bps)    | CER (bps)    |
| <b>BH</b>                              | N/A          | N/A          | N/A          |
| <b>HV<sub>I</sub></b>                  | 249          | 528          | 816          |
| <b>VIX<sub>I</sub></b>                 | 326          | 586          | 863          |
| <b>SVX<sub>I</sub></b>                 | 330          | 589          | 865          |
| <b>SVX<sup>D</sup><sub>I</sub></b>     | 331          | 590          | 866          |
| Panel B: With Transaction Cost (0.25%) |              |              |              |
|                                        | CER (bps)    | CER (bps)    | CER (bps)    |
| Predictor                              | CER (bps)    | CER (bps)    | CER (bps)    |
| <b>BH</b>                              | N/A          | N/A          | N/A          |
| <b>HV<sub>I</sub></b>                  | 193          | 486          | 816          |
| <b>VIX<sub>I</sub></b>                 | 266          | 540          | 863          |
| <b>SVX<sub>I</sub></b>                 | 269          | 543          | 865          |
| <b>SVX<sup>D</sup><sub>I</sub></b>     | 270          | 544          | 866          |

This table reports the monthly out-of-sample portfolio allocation results from January 1998 to April 2016. We compare five strategies: buy-and-hold (BH), volatility timing based on HV<sub>I</sub>, volatility timing based on VIX<sub>I</sub>, volatility timing based on SVX<sub>I</sub>, and volatility timing based on SVX<sup>D</sup><sub>I</sub>. We report average annualized certainty equivalent return (CER) gains for 49 industries under risk aversion coefficients of 3, 4, and 5. The CER gain (expressed in annualized basis points) is for a mean-variance investor who allocates between the industry portfolio and risk-free asset using the volatility timing strategy, relative to the naïve buy-and-hold passive strategy (BH). Panel A presents the results without transaction cost and Panel B presents the results counting for transaction cost.

<https://doi.org/10.1371/journal.pone.0215032.t007>

follows:

$$\bar{R}_{p,t+1} = R_{p,t+1} - \rho(1 + R_{p,t+1})|\Delta w_{t+1}|, \tag{31}$$

where  $\bar{R}_{p,t+1}$  is the transaction cost adjusted portfolio return,  $R_{p,t+1}$  is the pre-adjusted portfolio return,  $\rho$  is the transaction cost parameter, and is set to be 0.0025, and  $\Delta w_{t+1}$  is the change of weight from month  $t$  to month  $t+1$ .

Panel B of Table 7 presents the results for transaction cost adjusted performance. It clearly shows that, even when we account for transaction cost, volatility timing strategies based on VIX<sub>I</sub>, SVX<sub>I</sub>, and SVX<sup>D</sup><sub>I</sub>, still largely outperform the buy-and-hold strategy and the volatility timing strategy based on HV<sub>I</sub>. Consistent with Panel A, SVX<sup>D</sup><sub>I</sub> generates the highest CER gain (269 bps) for  $\gamma = 3$ , and again, economic values are larger when the investor is more risk-averse (CER gains of 544 bps for  $\gamma = 4$  and 829 bps for  $\gamma = 5$ ).

In summary, this section uses a volatility timing strategy to show that the strong forecasting abilities of the industry volatility indices (VIX<sub>I</sub>, SVX<sub>I</sub>, and SVX<sup>D</sup><sub>I</sub>) have significant economic value for investors.

### Conclusion

This paper is novel in that it proposes a general equilibrium framework to price volatility in the same manner as is the case for all securities in the market, following Arrow and Debreu [6]. Using state prices estimated from S&P 500 index options, we illustrate how we can derive *ex-ante* volatility measures SVX<sub>I</sub> for industry portfolios, in which there are no traded options. The SVX<sub>I</sub> measures generate superior forecasting abilities for the future realized volatility and serve as qualified fear gauges. We show that our approach is flexible and general by extending



it to downside risk and upside opportunity. Finally, we demonstrate that the superior forecasting ability of our general equilibrium volatility measure can create significant economic value through a simple volatility timing strategy. Our findings, together with the fact that the industry volatility indices can be easily constructed under the general equilibrium framework, offer practitioners an appealing alternative tool for managing volatility. Our general equilibrium framework is not limited to pricing volatility, but can be applied to price any moments of the return distribution.

## Supporting information

### **S1 Data. Data.**

(ZIP)

### **S1 Appendix. Estimation of state prices.**

(DOCX)

### **S2 Appendix. Equilibrium price, CAPM and Co-skewness pricing.**

(DOCX)

### **S3 Appendix. Construction method of industry volatility.**

(DOCX)

## Author Contributions

**Conceptualization:** Jianlei Han, Martina Linnenluecke, Zhangxin Liu, Zheyao Pan, Tom Smith.

**Data curation:** Jianlei Han, Zheyao Pan.

**Formal analysis:** Zhangxin Liu.

**Funding acquisition:** Martina Linnenluecke, Tom Smith.

**Methodology:** Jianlei Han, Zhangxin Liu, Tom Smith.

**Supervision:** Tom Smith.

**Writing – original draft:** Martina Linnenluecke, Tom Smith.

**Writing – review & editing:** Jianlei Han, Zhangxin Liu, Zheyao Pan.

## References

1. Engle R. Autoregressive conditional heteroscedasticity with estimates of the variance of United Kingdom inflation. *Econometrica: Journal of the Econometric Society*. 1982; 50:987–1007.
2. Engle R. Dynamic conditional correlation: A simple class of multivariate generalized autoregressive conditional heteroskedasticity models. *Journal of Business & Economic Statistics*. 2002; 20(3):339–50.
3. Bollerslev T. Generalized autoregressive conditional heteroskedasticity. *Journal of Econometrics*. 1986; 31(3):307–27.
4. Barndorff-Nielsen OE. Econometric analysis of realized volatility and its use in estimating stochastic volatility models. *Journal of the Royal Statistical Society: Series B (Statistical Methodology)*. 2002; 64(2):253–80.
5. Fleming J, Ostdiek B, Whaley RE. Predicting stock market volatility: A new measure. *Journal of Futures Markets*. 1995; 15(3):265–302.
6. Arrow KJ, Debreu G. Existence of an equilibrium for a competitive economy. *Econometrica*. 1954; 22:265–90.
7. Ross SA. Options and efficiency. *The Quarterly Journal of Economics*. 1976; 90(1):75–89.

8. Breeden DT, Litzenberger RH. Prices of state-contingent claims implicit in option prices. *Journal of Business*. 1978; 51:621–51.
9. Yu H, Fang L, Sun B. The role of global economic policy uncertainty in long-run volatilities and correlations of US industry-level stock returns and crude oil. *PloS one*. 2018; 13(2):e0192305. <https://doi.org/10.1371/journal.pone.0192305> PMID: 29420645
10. Zhang Y, Liu Z, Xu Y. Carbon price volatility: The case of China. *PloS one*. 2018; 13(10):e0205317. <https://doi.org/10.1371/journal.pone.0205317> PMID: 30304004
11. Bekaert G, Engstrom E. Asset Return Dynamics under Habits and Bad Environment—Good Environment Fundamentals. *Journal of Political Economy*. 2017; 125(3):713–60.
12. Feunou B, Jahan-Parvar MR, Okou C. Downside variance risk premium. *Journal of Financial Econometrics*. 2017; 16(3):341–83.
13. Kilic M, Shaliastovich I. Good and bad variance premia and expected returns. *Management Science*. 2018; forthcoming. <https://doi.org/10.1287/mnsc.2017.2793>
14. Segal G, Shaliastovich I, Yaron A. Good and bad uncertainty: Macroeconomic and financial market implications. *Journal of Financial Economics*. 2015; 117(2):369–97.
15. Bansal R, Gallant R, Tauchen G. Rational pessimism, rational exuberance, and markets for macro risks. Manuscript, Fuqua School of Business, Duke University, Durham NC. 2004.
16. Bansal R, Yaron A. Risks for the long run: A potential resolution of asset pricing puzzles. *The Journal of Finance*. 2004; 59(4):1481–509.
17. Tauchen G. Stochastic volatility in general equilibrium. *The Quarterly Journal of Finance*. 2011; 1(04):707–31.
18. Bansal R, Kiku D, Shaliastovich I, Yaron A. Volatility, the macroeconomy, and asset prices. *The Journal of Finance*. 2014; 69(6):2471–511.
19. Britten-Jones M, Neuberger A. Option prices, implied price processes, and stochastic volatility. *The Journal of Finance*. 2000; 55(2):839–66.
20. Jiang GJ, Tian YS. The model-free implied volatility and its information content. *The Review of Financial Studies*. 2005; 18(4):1305–42.
21. Martin I. What is the Expected Return on the Market? *The Quarterly Journal of Economics*. 2017; 132(1):367–433.
22. Martin I, Wagner C. What is the Expected Return on a Stock? *The Journal of Finance*. 2018; forthcoming.
23. Andersen T, Bondarenko O. Volatility as an asset class, chap. *Construction and Interpretation of Model-Free Implied Volatility*, 141–81. London, UK: Risk Books; 2007.
24. Sharpe WF. Capital asset prices: A theory of market equilibrium under conditions of risk. *The Journal of Finance*. 1964; 19(3):425–42.
25. Kraus A, Litzenberger RH. Skewness preference and the valuation of risk assets. *The Journal of Finance*. 1976; 31(4):1085–100.
26. Liu ZF, O'Neill MJ. State-preference pricing and volatility indices. *Accounting & Finance*. 2017; 57(3):815–36.
27. Brennan MJ, Cao HH. Information, trade, and derivative securities. *The Review of Financial Studies*. 1996; 9(1):163–208.
28. Pan Z. A state-price volatility index for the US government bond market. *Accounting & Finance*. 2018; 58:573–97.
29. Cao HH, Ou-Yang H. Differences of opinion of public information and speculative trading in stocks and options. *The Review of Financial Studies*. 2008; 22(1):299–335.
30. Boudoukh J, Richardson M, Whitelaw RF. Industry returns and the Fisher effect. *The Journal of Finance*. 1994; 49(5):1595–615.
31. CBOE. The CBOE volatility index—VIX. White Paper. 2009:1–23.
32. Mincer JA, Zarnowitz V. The evaluation of economic forecasts. *Economic forecasts and expectations: Analysis of forecasting behavior and performance: ( National Bureau of Economic Research, New York); 1969. p. 3–46.*
33. Newey WK, West KD. Automatic Lag Selection in Covariance Matrix Estimation. *The Review of Economic Studies*. 1994; 61(4):631–53.
34. Carr P, Wu L. Variance risk premiums. *Review of Financial Studies*. 2009; 22(3):1311–41.
35. Whaley RE. Understanding the VIX. *The Journal of Portfolio Management*. 2009; 35(3):98–105.

36. Patton AJ, Sheppard K. Good volatility, bad volatility: Signed jumps and the persistence of volatility. *Review of Economics and Statistics*. 2015; 97(3):683–97.
37. Ang A, Chen J. Asymmetric correlations of equity portfolios. *Journal of Financial Economics*. 2002; 63(3):443–94.
38. Campbell R, Koedijk K, Kofman P. Increased correlation in bear markets. *Financial Analysts Journal*. 2002; 58:87–94.
39. Fleming J, Kirby C, Ostdiek B. The economic value of volatility timing. *The Journal of Finance*. 2001; 56(1):329–52.
40. Fleming J, Kirby C, Ostdiek B. The economic value of volatility timing using “realized” volatility. *Journal of Financial Economics*. 2003; 67(3):473–509.
41. Marquering W, Verbeek M. The Economic Value of Predicting Stock Index Returns and Volatility. *Journal of Financial and Quantitative Analysis*. 2004; 39:407–29.
42. Grossman S. On the efficiency of competitive stock markets where trades have diverse information. *The Journal of Finance*. 1976; 31(2):573–85.
43. Admati AR. A noisy rational expectations equilibrium for multi-asset securities markets. *Econometrica: Journal of the Econometric Society*. 1985; 53(3):629–57.
44. Campbell JY, Thompson SB. Predicting excess stock returns out of sample: Can anything beat the historical average? *Review of Financial Studies*. 2008; 21(4):1509–31.
45. Rapach DE, Ringgenberg MC, Zhou G. Short interest and aggregate stock returns. *Journal of Financial Economics*. 2016; 121(1):46–65.
46. Bandi FM, Russell JR, Zhu Y. Using high-frequency data in dynamic portfolio choice. *Econometric Reviews*. 2008; 27(1–3):163–98.
47. Nolte I, Xu Q. The economic value of volatility timing with realized jumps. *Journal of Empirical Finance*. 2015; 34:45–59.
